# Supplementary material
Source: PubMed Central journal article supplement (PMC4702713)
Supplement: JCM.02177-15_zjm999094681so1.pdf [file JCM.02177-15_zjm999094681so1.pdf]

Table S1: Characteristics of NH/NP isolates collected by the CNR-Strep between 2007 and 2013.

| Isolate*  | Patient | Invasive / non-invasive | EOD / LOD <sup>a</sup> | Source <sup>b,c</sup> | Syndrome <sup>d</sup> | CSP | ST <sup>d</sup> |
|-----------|---------|-------------------------|------------------------|-----------------------|-----------------------|-----|-----------------|
| 20130013  | neonate | Invasive                | EOD                    | Blood                 | Bacteremia            | Ib  | ND              |
| 209800983 | neonate | Invasive                | EOD                    | Blood                 | Bacteremia            | III | ND              |
| 20131298  | neonate | Invasive                | EOD                    | Blood                 | Bacteremia            | VI  | ND              |
| CCH1330*  | neonate | Invasive                | EOD                    | Blood                 | Bacteremia            | III | 17              |
| CCH1352*  | neonate | Invasive                | EOD                    | CSF <sup>b</sup>      | Meningitis            | III | 17              |
| CCH1322*  | neonate | Invasive                | LOD                    | Blood                 | Bacteremia            | Ia  | 23              |
| CCH1319*  | neonate | Invasive                | LOD                    | Blood                 | Bacteremia            | III | 17              |
| CCH1320*  | neonate | Invasive                | LOD                    | Blood                 | Bacteremia            | III | 17              |
| CCH1336*  | neonate | Invasive                | LOD                    | Blood                 | Bacteremia            | III | 17              |
| CCH1337*  | neonate | Invasive                | LOD                    | Blood                 | Bacteremia            | III | 27              |
| 20130207  | neonate | Invasive                | LOD                    | Blood                 | Bacteremia            | III | ND              |
| CCH1340*  | neonate | Invasive                | LOD                    | Blood                 | Bacteremia            | IV  | 459             |
| CCH1318*  | neonate | Invasive                | LOD                    | CSF <sup>b</sup>      | Meningitis            | III | 17              |
| CCH1341*  | neonate | Invasive                | LOD                    | CSF <sup>b</sup>      | Meningitis            | III | 17              |
| CCH1333*  | neonate | Invasive                | LOD                    | CSF <sup>b</sup>      | Meningitis            | III | 17              |
| 206800210 | neonate | Invasive                | LOD                    | Blood                 | Bacteremia            | III | ND              |
| 20130673  | neonate | Non-invasive            | -                      | Gastric fluid         | Colonization          | IV  | ND              |
| 211800629 | neonate | Non-invasive            | -                      | Gastric fluid         | Colonization          | III | ND              |
| 210800492 | neonate | Non-invasive            | -                      | Gastric fluid         | Colonization          | Ia  | ND              |
| 210800493 | neonate | Non-invasive            | -                      | Gastric fluid         | Colonization          | Ia  | ND              |
| 20130069  | neonate | Non-invasive            | -                      | Stools                | Colonization          | Ia  | ND              |
| CCH1344*  | adult   | Invasive                | -                      | Blood                 | Bacteremia            | Ib  | 8               |
| 20130718  | adult   | Invasive                | -                      | Blood                 | Bacteremia            | Ib  | ND              |
| 20130856  | adult   | Invasive                | -                      | Blood                 | Bacteremia            | Ib  | ND              |
| CCH1351*  | adult   | Invasive                | -                      | Blood                 | Bacteremia            | II  | 2               |
| CCH1345*  | adult   | Invasive                | -                      | Blood                 | Bacteremia            | II  | 10              |
| CCH1329*  | adult   | Invasive                | -                      | Blood                 | Bacteremia            | II  | 12              |
| CCH1343*  | adult   | Invasive                | -                      | Blood                 | Bacteremia            | II  | 22              |
| 20121061  | adult   | Invasive                | -                      | Blood                 | Bacteremia            | II  | ND              |
| 20130897  | adult   | Invasive                | -                      | Blood                 | Bacteremia            | II  | ND              |
| CCH1347*  | adult   | Invasive                | -                      | Blood                 | Bacteremia            | III | 17              |
| CCH1323*  | adult   | Invasive                | -                      | Blood                 | Bacteremia            | III | 27              |
| 209800984 | adult   | Invasive                | -                      | Blood                 | Bacteremia            | III | ND              |
| 20121067  | adult   | Invasive                | -                      | Blood                 | Bacteremia            | III | ND              |
| 20121576  | adult   | Invasive                | -                      | Blood                 | Bacteremia            | III | ND              |
| CCH1348*  | adult   | Invasive                | -                      | Blood                 | Bacteremia            | IV  | 459             |
| 20131002  | adult   | Invasive                | -                      | Blood                 | Bacteremia            | IV  | ND              |
| CCH1350*  | adult   | Invasive                | -                      | Blood                 | Bacteremia            | V   | 1               |
| CCH1328*  | adult   | Invasive                | -                      | Blood                 | Bacteremia            | V   | 1               |
| 209800638 | adult   | Invasive                | -                      | Blood                 | Bacteremia            | V   | ND              |
| 20121276  | adult   | Invasive                | -                      | Blood                 | Bacteremia            | V   | ND              |
| 20121410  | adult   | Invasive                | -                      | Blood                 | Bacteremia            | V   | ND              |
| 20121597  | adult   | Invasive                | -                      | Blood                 | Bacteremia            | V   | ND              |

|           |       |              |   |                  |                      |     |     |
|-----------|-------|--------------|---|------------------|----------------------|-----|-----|
| CCH1334*  | adult | Invasive     | - | Blood            | Erysypelas           | III | 17  |
| CCH1325*  | adult | Invasive     | - | Blood            | Endocarditis         | III | 1   |
| CCH1324*  | adult | Invasive     | - | Blood            | Endocarditis         | V   | 1   |
| 20121165  | adult | Invasive     | - | Blood            | Bone/joint infection | III | ND  |
| 207801032 | adult | Invasive     | - | Bone biopsy      | Bone/joint infection | II  | ND  |
| CCH1349*  | adult | Invasive     | - | Bone biopsy      | Bone/joint infection | Ib  | 1   |
| 20131427  | adult | Invasive     | - | Bone biopsy      | Bone/joint infection | II  | ND  |
| CCH1331*  | adult | Invasive     | - | Joint fluid      | Bone/joint infection | V   | 1   |
| CCH1338*  | adult | Invasive     | - | CSF <sup>b</sup> | Meningitis           | III | 366 |
| CCH1342*  | adult | Non-invasive | - | Sperm            | Colonization         | III | 27  |
| 20130156  | adult | Non-invasive | - | Urine            | UTI <sup>c</sup>     | III | ND  |
| CCH1327*  | adult | Non-invasive | - | Abscess          | Abces                | II  | 28  |
| CCH1326*  | adult | Non-invasive | - | Skin             | Ulcer                | III | 17  |
| CCH1339*  | adult | Non-invasive | - | Vagina           | Colonization         | Ia  | 136 |
| CCH1321*  | adult | Non-invasive | - | Vagina           | Colonization         | III | 106 |
| CCH1084*  | adult | Non-invasive | - | Vagina           | Colonization         | III | 1   |
| 20130765  | adult | Non-invasive | - | Vagina           | Colonization         | III | ND  |
| 20131184  | adult | Non-invasive | - | Vagina           | Colonization         | III | ND  |
| CCH1346*  | adult | Non-invasive | - | Vagina           | Colonization         | IV  | 1   |
| 20130064  | adult | Non-invasive | - | Vagina           | Colonization         | IV  | ND  |

\*: Sequenced isolates

<sup>a</sup>: EOD/LOD: Early Onset Disease; Late Onset Disease

<sup>b</sup>: Cerebrospinal Fluid

<sup>c</sup>: Urinary Track Infection

<sup>d</sup>: ND Not Determined

Table S2: Bacterial strains used in this study.

| Strain                      | Relevant properties                                  | Source     |
|-----------------------------|------------------------------------------------------|------------|
| <b><i>E. coli</i></b>       |                                                      |            |
| TG1                         | F', traD36, lacIq, proA+B+, lacZΔ, supE, hsdΔ5       |            |
| HB101 / pRK24               | Strains for <i>E. coli</i> to GBS conjugation        | [1]        |
| NEM3535                     | HB101 / prK24 + pTCV- <i>erm</i>                     | This study |
| NEM3536                     | HB101 / prK24 + pTCVΩP <sub>cyl+</sub> - <i>abx1</i> | This study |
| <b><i>S. agalactiae</i></b> |                                                      |            |
| NEM316                      | Clinical isolate, Serotype III ST-23                 | [2]        |
| BM110                       | Clinical isolate, Serotype III ST-17                 | [3, 4]     |
| A909                        | Clinical isolate, Serotype Ia                        | [5]        |
| 2603V/R                     | Clinical isolate, Serotype V                         | [6]        |
| 515                         | Clinical isolate, Serotype Ia                        | [5]        |
| H36B                        | Clinical isolate, Serotype Ib                        | [5]        |
| CCH1627                     | NEM316Δ <i>cylX</i>                                  | This study |
| CCH1628                     | NEM316Δ <i>cylD</i>                                  | This study |
| CCH1605                     | NEM316Δ <i>cylG</i>                                  | This study |
| NEM4190                     | NEM316Δ <i>cylAB</i>                                 | This study |
| NEM4192                     | NEM316Δ <i>cylI</i>                                  | This study |
| CCH10                       | NEM316Δ <i>cylE</i>                                  | [7]        |
| CCH1675                     | NEM316Δ <i>cylJ</i>                                  | [7]        |
| CCH1676                     | NEM316Δ <i>cylK</i>                                  | [7]        |
| CCH1353                     | CCH1084ΔIS:: <i>cyl</i>                              | This study |
| CCH1620                     | NEM316+IS:: <i>cyl</i>                               | This study |
| NEM3566                     | CCH1328+pTCV- <i>erm</i>                             | This study |
| NEM3567                     | CCH1328+pTCVΩP <sub>cyl+</sub> - <i>abx1</i>         | This study |
| NEM3568                     | CCH1331+pTCV- <i>erm</i>                             | This study |
| NEM3569                     | CCH1331+pTCVΩP <sub>cyl+</sub> - <i>abx1</i>         | This study |
| NEM3570                     | CCH1350+pTCV- <i>erm</i>                             | This study |
| NEM3571                     | CCH1350+pTCVΩP <sub>cyl+</sub> - <i>abx1</i>         | This study |
| NEM3564                     | CCH1324+pTCV- <i>erm</i>                             | This study |
| NEM3565                     | CCH1324+pTCVΩP <sub>cyl+</sub> - <i>abx1</i>         | This study |
| NEM3244                     | 2603V/R+pTCV- <i>erm</i>                             | [8]        |
| NEM3249                     | 2603V/R+pTCVΩP <sub>cyl+</sub> - <i>abx1</i>         | [8]        |

Table S3: Plasmids used in this study.

| <b>Plasmids</b>                      | <b>Markers</b> | <b>Relevant properties</b>                                       | <b>Source</b> |
|--------------------------------------|----------------|------------------------------------------------------------------|---------------|
| pGEM-T easy                          | Amp            | T7 and SP6 promoters                                             | Promega       |
| pG+host5                             | Ery            | ColE1 replicon, thermosensitive derivative of pGK12              | [9]           |
| pTCV- <i>erm</i>                     | Ery, Km        | Mob <sup>+</sup> (IncP); <i>oriR</i> pACYC184; <i>oriR</i> pAM_1 | [10]          |
| pTCVΩP <sub>cyl+</sub> - <i>abx1</i> | Ery, Km        | <i>abx1</i> complementing vector, promoter P <sub>abx1</sub>     | [8]           |
| pG+host5ΩΔ <i>cylX</i>               | Ery            | <i>cylX</i> in-frame deletion vector                             | This study    |
| pG+host5ΩΔ <i>cylD</i>               | Ery            | <i>cylD</i> in-frame deletion vector                             | This study    |
| pG+host5ΩΔ <i>cylG</i>               | Ery            | <i>cylG</i> in-frame deletion vector                             | This study    |
| pG+host5ΩΔ <i>cylAB</i>              | Ery            | <i>cylAB</i> in-frame deletion vector                            | This study    |
| pG+host5ΩΔ <i>cylI</i>               | Ery            | <i>cylI</i> in-frame deletion vector                             | This study    |
| pG+host5ΩΔIS                         | Ery            | IS1381 in-frame deletion vector                                  | This study    |
| pG+host5ΩIS                          | Ery            | Truncated IS1381 in-frame insertion vector                       | This study    |

Amp: Ampicillin; Ery: Erythromycin; Km: Kanamycin.

Table S4 : Primers used in this study.

| Primer                     | Sequence (5'-3')*                                  | Gene target           |
|----------------------------|----------------------------------------------------|-----------------------|
| For plasmids constructions |                                                    |                       |
| <i>cylX</i> -5b            | aaaGGTACCaggcaagccattaatTTTTTgagt                  | $\Delta$ <i>cylX</i>  |
| <i>cylX</i> -3b            | aaaGGATCCcgtcatcaaagaaagaacggttgactt               | $\Delta$ <i>cylX</i>  |
| <i>cylX</i> -int1          | ggcacgcccgggtgctgccgcctactcaaaatattagaacg          | $\Delta$ <i>cylX</i>  |
| <i>cylX</i> -int2          | gcggcagcaccggggtgctgccctattaatggaaaggattgaa        | $\Delta$ <i>cylX</i>  |
| <i>cylAB</i> -5b           | atctGAATTCatagtgggatatagatgaccaagc                 | $\Delta$ <i>cylAB</i> |
| <i>cylAB</i> -3b           | acatGGATCCtgtcttatcatactctttgaagcca                | $\Delta$ <i>cylAB</i> |
| <i>cylAB</i> -int1         | aatgagggcaatgacataaatcaacttaattccattttctgataccaac  | $\Delta$ <i>cylAB</i> |
| <i>cylAB</i> -int2         | gttggtatcagaaaatggaaattaagttgatttatgcttgcctcattc   | $\Delta$ <i>cylAB</i> |
| <i>cylD</i> -5b            | aaaGAATTCtactcatgattttgtgaattcaac                  | $\Delta$ <i>cylD</i>  |
| <i>cylD</i> -3b            | aaaGGATCCtcatatctgtttcaatgaatc                     | $\Delta$ <i>cylD</i>  |
| <i>cylD</i> -int1          | ggcacgcccgggtgctgccgcctgaacattaccctgtcctcc         | $\Delta$ <i>cylD</i>  |
| <i>cylD</i> -int2          | gcggcagcaccggggtgctgccagggggaggaaacagttatga        | $\Delta$ <i>cylD</i>  |
| <i>cylG</i> -5b            | aaaGGTACCgtctgaagagctttggcttttg                    | $\Delta$ <i>cylG</i>  |
| <i>cylG</i> -3b            | aaaGGATCCcaatcatcaaaacaccgggaac                    | $\Delta$ <i>cylG</i>  |
| <i>cylG</i> -int1          | ggcacgcccgggtgctgccgcaccaccagtaactattgctac         | $\Delta$ <i>cylG</i>  |
| <i>cylG</i> -int2          | gcggcagcaccggggtgctgccgtgattgatggaggaatgatt        | $\Delta$ <i>cylG</i>  |
| <i>cylI</i> -5b            | acatGAATTCatcttgctagatttgTTTTctgg                  | $\Delta$ <i>cylI</i>  |
| <i>cylI</i> -3b            | acatGGATCCtgttccacgttttaacatttggtg                 | $\Delta$ <i>cylI</i>  |
| <i>cylI</i> -int1          | aataatagcaaaagagataccacctctattccactaacatatacgcctc  | $\Delta$ <i>cylI</i>  |
| <i>cylI</i> -int2          | gagcgtatatgttagtggaataggaggtggtatctcttttgctattattg | $\Delta$ <i>cylI</i>  |
| <i>cyl628</i> -EcoR1       | gatatGAATTCgaagatgattagttgaaggtga                  | $\Delta$ <i>IS</i>    |
| <i>cyl628</i> -Pst1        | gacaaCTGCAGataagttgggcacgacgtt                     | $\Delta$ <i>IS</i>    |
| <i>cyl628</i> -int1        | ggatcccaagggaaggtaccaccaacaaggcgcttaaatcg          | <i>cyl::IS</i>        |
| <i>cyl628</i> -int2        | ggtaccttcccttgggatcccctatcgaaatcgacgcaaacgg        | <i>cyl::IS</i>        |
| For sequence analysis      |                                                    |                       |
| <i>covR</i> _5'            | ggttggggtagaagcggatttatcag                         | <i>covR</i>           |
| <i>covR</i> _3'            | ctttccatggattaccaatag                              | <i>covR</i>           |
| <i>covS</i> _5'            | gaaagatcagtttataggggtaaaac                         | <i>covS</i>           |
| <i>covS</i> _3'            | caaagcgcacataagtaatctc                             | <i>covS</i>           |
| <i>covS2</i> _5'           | tcagaagacgaaattggagaattg                           | <i>covS</i>           |
| <i>abx1</i> -fwd           | agtttctgcaactgaccttccac                            | <i>abx1</i>           |
| <i>abx1</i> -rev           | tgggcgataacttggtcattgtg                            | <i>abx1</i>           |
| <i>stk1</i> -F             | gctacagtactaacacaag                                | <i>stk1</i>           |
| <i>stk1</i> -R             | ctaggcatggtctctaccatagc                            | <i>stk1</i>           |
| <i>stk1</i> -F2            | gtaggtagtggtcattatt                                | <i>stk1</i>           |
| <i>stk1</i> -F3            | ctccaaacaagagtttcactc                              | <i>stk1</i>           |
| <i>cylX</i> -5kon          | cccgtgcttacttcttacaag                              | <i>cylX</i>           |
| <i>cyl628</i> -5kon        | gtgttgagaataatgcccctcatag                          | <i>cylX</i>           |
| <i>cyl1</i> F              | caacacttaagtcatgacctcatt                           | <i>cylX</i>           |
| <i>cylD</i> -3kon          | gcatcaatagagtctagctctaate                          | <i>cylD</i>           |
| <i>cyl628</i> -3kon        | gctactttcataactgtttcctcc                           | <i>cylD</i>           |
| <i>cyl1.1</i> F            | gttcatgcgtctatgttagc                               | <i>cylD</i>           |

---

|                |                           |                |
|----------------|---------------------------|----------------|
| cyl1.1R        | ccatctgatgcaaattcttgc     | <i>cylG</i>    |
| cyl2F          | gccctagaactgtcaataggga    | <i>acpC</i>    |
| cyl1R          | ggaactataggacgttggtg      | <i>cylZ</i>    |
| cyl2.2F        | cttggacctaattggagctggta   | <i>cylA</i>    |
| cyl2.3R        | tcagctatcgaaagttggtc      | <i>cylA</i>    |
| cyl2.2R        | gcaaagatgcaagagaacatcgtc  | <i>cylB</i>    |
| <i>cylEF</i>   | gcgtaatgctgatggagaaaggct  | <i>cylB</i>    |
| cyl2R          | aggcctaccgtctggaattga     | <i>cylE</i>    |
| <i>cylE.1F</i> | gtcgtagtggacaggcaatcactt  | <i>cylE</i>    |
| <i>cylE.1R</i> | cctccgatgatgcttgtaaacc    | <i>cylE</i>    |
| cyl4F          | ggaactcaccttatgctacaaatg  | <i>cylE</i>    |
| <i>cylER</i>   | ggaatcacaaggtctaagg       | <i>cylF</i>    |
| cyl4.1F        | agcagagtatggggatgaactga   | <i>cylF</i>    |
| cyl4R          | gcaggaatgtttctagagggtga   | <i>cylI</i>    |
| cyl4.1R        | gctcctagtgatgtgaagcc      | <i>cylI</i>    |
| cyl5F          | gcggcaatagaggaaacagactgta | <i>cylI</i>    |
| cyl5.1F        | tagtggagcgcttgatggta      | <i>cylI</i>    |
| cyl5R          | gctgccatgcataaactgttcct   | <i>cylJ</i>    |
| cyl5.1R        | gacggtaacctgtcaatacagc    | <i>cylJ</i>    |
| cyl6F          | actgacaagctgtggtgaggctat  | <i>cylJ</i>    |
| <i>cylKbis</i> | cacatgttgcgagttagtattctgg | <i>cylK</i>    |
| cyl6R          | tcgctgatcttccggcgtgatatg  | <i>gbs0657</i> |
| cyl7F          | gatggcttatgctggactaacctc  | <i>gbs0657</i> |
| cyl7R          | aaccagacttcctcaggcttact   | <i>gbs0658</i> |

---

\* Restriction sites are in capital letters.

### References cited in Supplementary Tables

1. Trieu-Cuot P, Carlier C, Poyart-Salmeron C, Courvalin P. Shuttle vectors containing a multiple cloning site and a lacZ alpha gene for conjugal transfer of DNA from *Escherichia coli* to gram-positive bacteria. *Gene* **1991**; 102:99-104.
2. Glaser P, Rusniok C, Buchrieser C, et al. Genome sequence of *Streptococcus agalactiae*, a pathogen causing invasive neonatal disease. *Mol Microbiol* **2002**; 45:1499-513.
3. Musser JM, Mattingly SJ, Quentin R, Goudeau A, Selander RK. Identification of a high-virulence clone of type III *Streptococcus agalactiae* (group B *Streptococcus*) causing invasive neonatal disease. *Proc Natl Acad Sci U S A* **1989**; 86:4731-5.
4. Stalhammar-Carlemalm M, Stenberg L, Lindahl G. Protein rib: a novel group B streptococcal cell surface protein that confers protective immunity and is expressed by most strains causing invasive infections. *The Journal of experimental medicine* **1993**; 177:1593-603.
5. Tettelin H, Massignani V, Cieslewicz MJ, et al. Genome analysis of multiple pathogenic isolates of *Streptococcus agalactiae*: implications for the microbial "pan-genome". *Proc Natl Acad Sci U S A* **2005**; 102:13950-5.
6. Tettelin H, Massignani V, Cieslewicz MJ, et al. Complete genome sequence and comparative genomic analysis of an emerging human pathogen, serotype V *Streptococcus agalactiae*. *Proc Natl Acad Sci U S A* **2002**; 99:12391-6.
7. Forquin MP, Tazi A, Rosa-Fraile M, Poyart C, Trieu-Cuot P, Dramsi S. The putative glycosyltransferase-encoding gene *cylJ* and the Group B *Streptococcus* (GBS)-specific gene *cylK* modulate hemolysin production and virulence of GBS. *Infect Immun* **2007**; 75:2063-6.
8. Firon A, Tazi A, Da Cunha V, et al. The Abi-domain Protein Abx1 Interacts with the CovS Histidine Kinase to Control Virulence Gene Expression in Group B *Streptococcus*. *PLoS Pathog* **2013**; 9:e1003179.
9. Biswas I, Gruss A, Ehrlich SD, Maguin E. High-efficiency gene inactivation and replacement system for gram-positive bacteria. *J Bacteriol* **1993**; 175:3628-35.
10. Poyart C, Lamy MC, Boumaila C, Fiedler F, Trieu-Cuot P. Regulation of D-alanyl-lipoteichoic acid biosynthesis in *Streptococcus agalactiae* involves a novel two-component regulatory system. *J Bacteriol* **2001**; 183:6324-34.
